# Supplementary material
Source: Springer Nature journal article supplement (https://www.springermedizin.de/resource/supplementary/12939_2012_353_MOESM4_ESM.pdf/9550958)

Prevalence ratio

0.1

1

0 to 5

6 to 11

12 to 23

24 to 35

36 to 47

48 to 59

Age in months

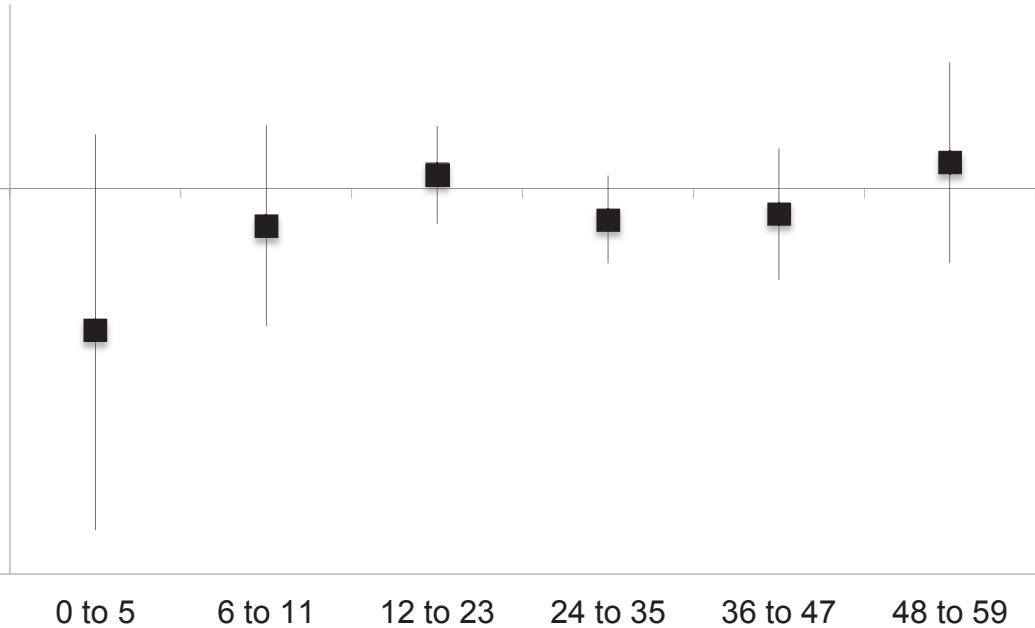

Supplement: MOESM4 [file 9550958]
